# Supplementary material for: An epidemiological analysis of the level of biosecurity and animal welfare on pig farms in Japan and their effect on the use of veterinary antimicrobials
Source: PubMed Central journal article supplement — J Vet Med Sci. 2018 Oct 29;80(12):1853–60. doi: 10.1292/jvms.18-0287 (PMC6305507; doi:10.1292/jvms.18-0287), 2018-10-29
Supplement: jvms-80-1853-s001.pdf [file jvms-80-1853-s001.pdf]

Supplementary Table 1. The questionnaire for evaluating on-farm biosecurity level developed by authors based on the biosecurity assessment tool 'BioAsseT' developed by PRRS-Japan Elimination Team (P-JET) composed of a group of swine veterinarians (<http://site-pjet.com/>).

| Questions                                                                                        | Answer Frame                                                                                                                                                                                                                                                                                                                                                                                                                                                                                                                                                                  | Scoring |                                                                                                                                                                |   |                                                                                                                           |   |                                                                                                                                                                     |                                                                                         |                                                                                                     |                                                                                                                       |                                                                                         |                                                                                                                                 |     |   |   |   |   |
|--------------------------------------------------------------------------------------------------|-------------------------------------------------------------------------------------------------------------------------------------------------------------------------------------------------------------------------------------------------------------------------------------------------------------------------------------------------------------------------------------------------------------------------------------------------------------------------------------------------------------------------------------------------------------------------------|---------|----------------------------------------------------------------------------------------------------------------------------------------------------------------|---|---------------------------------------------------------------------------------------------------------------------------|---|---------------------------------------------------------------------------------------------------------------------------------------------------------------------|-----------------------------------------------------------------------------------------|-----------------------------------------------------------------------------------------------------|-----------------------------------------------------------------------------------------------------------------------|-----------------------------------------------------------------------------------------|---------------------------------------------------------------------------------------------------------------------------------|-----|---|---|---|---|
| <b>I. Site</b>                                                                                   |                                                                                                                                                                                                                                                                                                                                                                                                                                                                                                                                                                               |         |                                                                                                                                                                |   |                                                                                                                           |   |                                                                                                                                                                     |                                                                                         |                                                                                                     |                                                                                                                       |                                                                                         |                                                                                                                                 |     |   |   |   |   |
| <b>i. Site Condition</b>                                                                         |                                                                                                                                                                                                                                                                                                                                                                                                                                                                                                                                                                               |         |                                                                                                                                                                |   |                                                                                                                           |   |                                                                                                                                                                     |                                                                                         |                                                                                                     |                                                                                                                       |                                                                                         |                                                                                                                                 |     |   |   |   |   |
| 1) Choose the number of other farms located within 3 km radius from your farm.                   | <table border="1"> <tr><td>A</td><td>0</td></tr> <tr><td>B</td><td>1, 2</td></tr> <tr><td>C</td><td>3,4</td></tr> <tr><td>D</td><td>5 or more.</td></tr> </table>                                                                                                                                                                                                                                                                                                                                                                                                             | A       | 0                                                                                                                                                              | B | 1, 2                                                                                                                      | C | 3,4                                                                                                                                                                 | D                                                                                       | 5 or more.                                                                                          | <table border="1"> <tr><td>4</td></tr> <tr><td>4/3*2=8/3</td></tr> <tr><td>4/3</td></tr> <tr><td>0</td></tr> </table> | 4                                                                                       | 4/3*2=8/3                                                                                                                       | 4/3 | 0 |   |   |   |
| A                                                                                                | 0                                                                                                                                                                                                                                                                                                                                                                                                                                                                                                                                                                             |         |                                                                                                                                                                |   |                                                                                                                           |   |                                                                                                                                                                     |                                                                                         |                                                                                                     |                                                                                                                       |                                                                                         |                                                                                                                                 |     |   |   |   |   |
| B                                                                                                | 1, 2                                                                                                                                                                                                                                                                                                                                                                                                                                                                                                                                                                          |         |                                                                                                                                                                |   |                                                                                                                           |   |                                                                                                                                                                     |                                                                                         |                                                                                                     |                                                                                                                       |                                                                                         |                                                                                                                                 |     |   |   |   |   |
| C                                                                                                | 3,4                                                                                                                                                                                                                                                                                                                                                                                                                                                                                                                                                                           |         |                                                                                                                                                                |   |                                                                                                                           |   |                                                                                                                                                                     |                                                                                         |                                                                                                     |                                                                                                                       |                                                                                         |                                                                                                                                 |     |   |   |   |   |
| D                                                                                                | 5 or more.                                                                                                                                                                                                                                                                                                                                                                                                                                                                                                                                                                    |         |                                                                                                                                                                |   |                                                                                                                           |   |                                                                                                                                                                     |                                                                                         |                                                                                                     |                                                                                                                       |                                                                                         |                                                                                                                                 |     |   |   |   |   |
| 4                                                                                                |                                                                                                                                                                                                                                                                                                                                                                                                                                                                                                                                                                               |         |                                                                                                                                                                |   |                                                                                                                           |   |                                                                                                                                                                     |                                                                                         |                                                                                                     |                                                                                                                       |                                                                                         |                                                                                                                                 |     |   |   |   |   |
| 4/3*2=8/3                                                                                        |                                                                                                                                                                                                                                                                                                                                                                                                                                                                                                                                                                               |         |                                                                                                                                                                |   |                                                                                                                           |   |                                                                                                                                                                     |                                                                                         |                                                                                                     |                                                                                                                       |                                                                                         |                                                                                                                                 |     |   |   |   |   |
| 4/3                                                                                              |                                                                                                                                                                                                                                                                                                                                                                                                                                                                                                                                                                               |         |                                                                                                                                                                |   |                                                                                                                           |   |                                                                                                                                                                     |                                                                                         |                                                                                                     |                                                                                                                       |                                                                                         |                                                                                                                                 |     |   |   |   |   |
| 0                                                                                                |                                                                                                                                                                                                                                                                                                                                                                                                                                                                                                                                                                               |         |                                                                                                                                                                |   |                                                                                                                           |   |                                                                                                                                                                     |                                                                                         |                                                                                                     |                                                                                                                       |                                                                                         |                                                                                                                                 |     |   |   |   |   |
| 2) Choose the distance from the nearest neighboring farm.                                        | <table border="1"> <tr><td>A</td><td>More than 3km radius.</td></tr> <tr><td>B</td><td>Less than 3km radius but more than 1km radius.</td></tr> <tr><td>C</td><td>Less than 1km radius.</td></tr> <tr><td>D</td><td>On the same premises.</td></tr> </table>                                                                                                                                                                                                                                                                                                                  | A       | More than 3km radius.                                                                                                                                          | B | Less than 3km radius but more than 1km radius.                                                                            | C | Less than 1km radius.                                                                                                                                               | D                                                                                       | On the same premises.                                                                               | <table border="1"> <tr><td>4</td></tr> <tr><td>8/3</td></tr> <tr><td>4/3</td></tr> <tr><td>0</td></tr> </table>       | 4                                                                                       | 8/3                                                                                                                             | 4/3 | 0 |   |   |   |
| A                                                                                                | More than 3km radius.                                                                                                                                                                                                                                                                                                                                                                                                                                                                                                                                                         |         |                                                                                                                                                                |   |                                                                                                                           |   |                                                                                                                                                                     |                                                                                         |                                                                                                     |                                                                                                                       |                                                                                         |                                                                                                                                 |     |   |   |   |   |
| B                                                                                                | Less than 3km radius but more than 1km radius.                                                                                                                                                                                                                                                                                                                                                                                                                                                                                                                                |         |                                                                                                                                                                |   |                                                                                                                           |   |                                                                                                                                                                     |                                                                                         |                                                                                                     |                                                                                                                       |                                                                                         |                                                                                                                                 |     |   |   |   |   |
| C                                                                                                | Less than 1km radius.                                                                                                                                                                                                                                                                                                                                                                                                                                                                                                                                                         |         |                                                                                                                                                                |   |                                                                                                                           |   |                                                                                                                                                                     |                                                                                         |                                                                                                     |                                                                                                                       |                                                                                         |                                                                                                                                 |     |   |   |   |   |
| D                                                                                                | On the same premises.                                                                                                                                                                                                                                                                                                                                                                                                                                                                                                                                                         |         |                                                                                                                                                                |   |                                                                                                                           |   |                                                                                                                                                                     |                                                                                         |                                                                                                     |                                                                                                                       |                                                                                         |                                                                                                                                 |     |   |   |   |   |
| 4                                                                                                |                                                                                                                                                                                                                                                                                                                                                                                                                                                                                                                                                                               |         |                                                                                                                                                                |   |                                                                                                                           |   |                                                                                                                                                                     |                                                                                         |                                                                                                     |                                                                                                                       |                                                                                         |                                                                                                                                 |     |   |   |   |   |
| 8/3                                                                                              |                                                                                                                                                                                                                                                                                                                                                                                                                                                                                                                                                                               |         |                                                                                                                                                                |   |                                                                                                                           |   |                                                                                                                                                                     |                                                                                         |                                                                                                     |                                                                                                                       |                                                                                         |                                                                                                                                 |     |   |   |   |   |
| 4/3                                                                                              |                                                                                                                                                                                                                                                                                                                                                                                                                                                                                                                                                                               |         |                                                                                                                                                                |   |                                                                                                                           |   |                                                                                                                                                                     |                                                                                         |                                                                                                     |                                                                                                                       |                                                                                         |                                                                                                                                 |     |   |   |   |   |
| 0                                                                                                |                                                                                                                                                                                                                                                                                                                                                                                                                                                                                                                                                                               |         |                                                                                                                                                                |   |                                                                                                                           |   |                                                                                                                                                                     |                                                                                         |                                                                                                     |                                                                                                                       |                                                                                         |                                                                                                                                 |     |   |   |   |   |
| 3) Choose the distance from the nearest slaughterhouse.                                          | <table border="1"> <tr><td>A</td><td>More than 10km radius.</td></tr> <tr><td>B</td><td>Less than 10 km radius but more than 4km radius.</td></tr> <tr><td>C</td><td>Less than 4km radius but more than 1km radius.</td></tr> <tr><td>D</td><td>Less than 1km radius.</td></tr> </table>                                                                                                                                                                                                                                                                                      | A       | More than 10km radius.                                                                                                                                         | B | Less than 10 km radius but more than 4km radius.                                                                          | C | Less than 4km radius but more than 1km radius.                                                                                                                      | D                                                                                       | Less than 1km radius.                                                                               | <table border="1"> <tr><td>4</td></tr> <tr><td>8/3</td></tr> <tr><td>4/3</td></tr> <tr><td>0</td></tr> </table>       | 4                                                                                       | 8/3                                                                                                                             | 4/3 | 0 |   |   |   |
| A                                                                                                | More than 10km radius.                                                                                                                                                                                                                                                                                                                                                                                                                                                                                                                                                        |         |                                                                                                                                                                |   |                                                                                                                           |   |                                                                                                                                                                     |                                                                                         |                                                                                                     |                                                                                                                       |                                                                                         |                                                                                                                                 |     |   |   |   |   |
| B                                                                                                | Less than 10 km radius but more than 4km radius.                                                                                                                                                                                                                                                                                                                                                                                                                                                                                                                              |         |                                                                                                                                                                |   |                                                                                                                           |   |                                                                                                                                                                     |                                                                                         |                                                                                                     |                                                                                                                       |                                                                                         |                                                                                                                                 |     |   |   |   |   |
| C                                                                                                | Less than 4km radius but more than 1km radius.                                                                                                                                                                                                                                                                                                                                                                                                                                                                                                                                |         |                                                                                                                                                                |   |                                                                                                                           |   |                                                                                                                                                                     |                                                                                         |                                                                                                     |                                                                                                                       |                                                                                         |                                                                                                                                 |     |   |   |   |   |
| D                                                                                                | Less than 1km radius.                                                                                                                                                                                                                                                                                                                                                                                                                                                                                                                                                         |         |                                                                                                                                                                |   |                                                                                                                           |   |                                                                                                                                                                     |                                                                                         |                                                                                                     |                                                                                                                       |                                                                                         |                                                                                                                                 |     |   |   |   |   |
| 4                                                                                                |                                                                                                                                                                                                                                                                                                                                                                                                                                                                                                                                                                               |         |                                                                                                                                                                |   |                                                                                                                           |   |                                                                                                                                                                     |                                                                                         |                                                                                                     |                                                                                                                       |                                                                                         |                                                                                                                                 |     |   |   |   |   |
| 8/3                                                                                              |                                                                                                                                                                                                                                                                                                                                                                                                                                                                                                                                                                               |         |                                                                                                                                                                |   |                                                                                                                           |   |                                                                                                                                                                     |                                                                                         |                                                                                                     |                                                                                                                       |                                                                                         |                                                                                                                                 |     |   |   |   |   |
| 4/3                                                                                              |                                                                                                                                                                                                                                                                                                                                                                                                                                                                                                                                                                               |         |                                                                                                                                                                |   |                                                                                                                           |   |                                                                                                                                                                     |                                                                                         |                                                                                                     |                                                                                                                       |                                                                                         |                                                                                                                                 |     |   |   |   |   |
| 0                                                                                                |                                                                                                                                                                                                                                                                                                                                                                                                                                                                                                                                                                               |         |                                                                                                                                                                |   |                                                                                                                           |   |                                                                                                                                                                     |                                                                                         |                                                                                                     |                                                                                                                       |                                                                                         |                                                                                                                                 |     |   |   |   |   |
| 4) Choose the situation of the nearest public road.                                              | <table border="1"> <tr><td>A</td><td>Dead end.</td></tr> <tr><td>B</td><td>My farm is directly attached to the public road, but livestock transport vehicles <b>rarely</b> path.</td></tr> <tr><td>C</td><td>Public road run through my premises, but livestock transport vehicles <b>rarely</b> path.</td></tr> <tr><td>D</td><td>My farm is directly attached to the public road and livestock transport vehicles <b>often</b> path.</td></tr> <tr><td>E</td><td>Public road run through my premises and livestock transport vehicles <b>often</b> path.</td></tr> </table> | A       | Dead end.                                                                                                                                                      | B | My farm is directly attached to the public road, but livestock transport vehicles <b>rarely</b> path.                     | C | Public road run through my premises, but livestock transport vehicles <b>rarely</b> path.                                                                           | D                                                                                       | My farm is directly attached to the public road and livestock transport vehicles <b>often</b> path. | E                                                                                                                     | Public road run through my premises and livestock transport vehicles <b>often</b> path. | <table border="1"> <tr><td>4</td></tr> <tr><td>3</td></tr> <tr><td>2</td></tr> <tr><td>1</td></tr> <tr><td>0</td></tr> </table> | 4   | 3 | 2 | 1 | 0 |
| A                                                                                                | Dead end.                                                                                                                                                                                                                                                                                                                                                                                                                                                                                                                                                                     |         |                                                                                                                                                                |   |                                                                                                                           |   |                                                                                                                                                                     |                                                                                         |                                                                                                     |                                                                                                                       |                                                                                         |                                                                                                                                 |     |   |   |   |   |
| B                                                                                                | My farm is directly attached to the public road, but livestock transport vehicles <b>rarely</b> path.                                                                                                                                                                                                                                                                                                                                                                                                                                                                         |         |                                                                                                                                                                |   |                                                                                                                           |   |                                                                                                                                                                     |                                                                                         |                                                                                                     |                                                                                                                       |                                                                                         |                                                                                                                                 |     |   |   |   |   |
| C                                                                                                | Public road run through my premises, but livestock transport vehicles <b>rarely</b> path.                                                                                                                                                                                                                                                                                                                                                                                                                                                                                     |         |                                                                                                                                                                |   |                                                                                                                           |   |                                                                                                                                                                     |                                                                                         |                                                                                                     |                                                                                                                       |                                                                                         |                                                                                                                                 |     |   |   |   |   |
| D                                                                                                | My farm is directly attached to the public road and livestock transport vehicles <b>often</b> path.                                                                                                                                                                                                                                                                                                                                                                                                                                                                           |         |                                                                                                                                                                |   |                                                                                                                           |   |                                                                                                                                                                     |                                                                                         |                                                                                                     |                                                                                                                       |                                                                                         |                                                                                                                                 |     |   |   |   |   |
| E                                                                                                | Public road run through my premises and livestock transport vehicles <b>often</b> path.                                                                                                                                                                                                                                                                                                                                                                                                                                                                                       |         |                                                                                                                                                                |   |                                                                                                                           |   |                                                                                                                                                                     |                                                                                         |                                                                                                     |                                                                                                                       |                                                                                         |                                                                                                                                 |     |   |   |   |   |
| 4                                                                                                |                                                                                                                                                                                                                                                                                                                                                                                                                                                                                                                                                                               |         |                                                                                                                                                                |   |                                                                                                                           |   |                                                                                                                                                                     |                                                                                         |                                                                                                     |                                                                                                                       |                                                                                         |                                                                                                                                 |     |   |   |   |   |
| 3                                                                                                |                                                                                                                                                                                                                                                                                                                                                                                                                                                                                                                                                                               |         |                                                                                                                                                                |   |                                                                                                                           |   |                                                                                                                                                                     |                                                                                         |                                                                                                     |                                                                                                                       |                                                                                         |                                                                                                                                 |     |   |   |   |   |
| 2                                                                                                |                                                                                                                                                                                                                                                                                                                                                                                                                                                                                                                                                                               |         |                                                                                                                                                                |   |                                                                                                                           |   |                                                                                                                                                                     |                                                                                         |                                                                                                     |                                                                                                                       |                                                                                         |                                                                                                                                 |     |   |   |   |   |
| 1                                                                                                |                                                                                                                                                                                                                                                                                                                                                                                                                                                                                                                                                                               |         |                                                                                                                                                                |   |                                                                                                                           |   |                                                                                                                                                                     |                                                                                         |                                                                                                     |                                                                                                                       |                                                                                         |                                                                                                                                 |     |   |   |   |   |
| 0                                                                                                |                                                                                                                                                                                                                                                                                                                                                                                                                                                                                                                                                                               |         |                                                                                                                                                                |   |                                                                                                                           |   |                                                                                                                                                                     |                                                                                         |                                                                                                     |                                                                                                                       |                                                                                         |                                                                                                                                 |     |   |   |   |   |
| <b>II. External Biosecurity</b>                                                                  |                                                                                                                                                                                                                                                                                                                                                                                                                                                                                                                                                                               |         |                                                                                                                                                                |   |                                                                                                                           |   |                                                                                                                                                                     |                                                                                         |                                                                                                     |                                                                                                                       |                                                                                         |                                                                                                                                 |     |   |   |   |   |
| <b>ii. Replacement Gilts</b>                                                                     |                                                                                                                                                                                                                                                                                                                                                                                                                                                                                                                                                                               |         |                                                                                                                                                                |   |                                                                                                                           |   |                                                                                                                                                                     |                                                                                         |                                                                                                     |                                                                                                                       |                                                                                         |                                                                                                                                 |     |   |   |   |   |
| 5) Choose the introduction frequency of gilts.                                                   | <table border="1"> <tr><td>A</td><td>We don't introduce gilts from supplier (Complete closed flock.)</td></tr> <tr><td>B</td><td>We purchase introduce gilts annually (Self-rearing system.)</td></tr> <tr><td>C</td><td>We purchase gilts monthly.</td></tr> <tr><td>D</td><td>We purchase gilts weekly.</td></tr> </table>                                                                                                                                                                                                                                                  | A       | We don't introduce gilts from supplier (Complete closed flock.)                                                                                                | B | We purchase introduce gilts annually (Self-rearing system.)                                                               | C | We purchase gilts monthly.                                                                                                                                          | D                                                                                       | We purchase gilts weekly.                                                                           | <table border="1"> <tr><td>4</td></tr> <tr><td>8/3</td></tr> <tr><td>4/3</td></tr> <tr><td>0</td></tr> </table>       | 4                                                                                       | 8/3                                                                                                                             | 4/3 | 0 |   |   |   |
| A                                                                                                | We don't introduce gilts from supplier (Complete closed flock.)                                                                                                                                                                                                                                                                                                                                                                                                                                                                                                               |         |                                                                                                                                                                |   |                                                                                                                           |   |                                                                                                                                                                     |                                                                                         |                                                                                                     |                                                                                                                       |                                                                                         |                                                                                                                                 |     |   |   |   |   |
| B                                                                                                | We purchase introduce gilts annually (Self-rearing system.)                                                                                                                                                                                                                                                                                                                                                                                                                                                                                                                   |         |                                                                                                                                                                |   |                                                                                                                           |   |                                                                                                                                                                     |                                                                                         |                                                                                                     |                                                                                                                       |                                                                                         |                                                                                                                                 |     |   |   |   |   |
| C                                                                                                | We purchase gilts monthly.                                                                                                                                                                                                                                                                                                                                                                                                                                                                                                                                                    |         |                                                                                                                                                                |   |                                                                                                                           |   |                                                                                                                                                                     |                                                                                         |                                                                                                     |                                                                                                                       |                                                                                         |                                                                                                                                 |     |   |   |   |   |
| D                                                                                                | We purchase gilts weekly.                                                                                                                                                                                                                                                                                                                                                                                                                                                                                                                                                     |         |                                                                                                                                                                |   |                                                                                                                           |   |                                                                                                                                                                     |                                                                                         |                                                                                                     |                                                                                                                       |                                                                                         |                                                                                                                                 |     |   |   |   |   |
| 4                                                                                                |                                                                                                                                                                                                                                                                                                                                                                                                                                                                                                                                                                               |         |                                                                                                                                                                |   |                                                                                                                           |   |                                                                                                                                                                     |                                                                                         |                                                                                                     |                                                                                                                       |                                                                                         |                                                                                                                                 |     |   |   |   |   |
| 8/3                                                                                              |                                                                                                                                                                                                                                                                                                                                                                                                                                                                                                                                                                               |         |                                                                                                                                                                |   |                                                                                                                           |   |                                                                                                                                                                     |                                                                                         |                                                                                                     |                                                                                                                       |                                                                                         |                                                                                                                                 |     |   |   |   |   |
| 4/3                                                                                              |                                                                                                                                                                                                                                                                                                                                                                                                                                                                                                                                                                               |         |                                                                                                                                                                |   |                                                                                                                           |   |                                                                                                                                                                     |                                                                                         |                                                                                                     |                                                                                                                       |                                                                                         |                                                                                                                                 |     |   |   |   |   |
| 0                                                                                                |                                                                                                                                                                                                                                                                                                                                                                                                                                                                                                                                                                               |         |                                                                                                                                                                |   |                                                                                                                           |   |                                                                                                                                                                     |                                                                                         |                                                                                                     |                                                                                                                       |                                                                                         |                                                                                                                                 |     |   |   |   |   |
| 6) Choose the acclimatization/quarantine period for gilts to herd flora before entering stables. | <table border="1"> <tr><td>A</td><td>More than 3 months.</td></tr> <tr><td>B</td><td>Less than 3 months but more than 2 months.</td></tr> <tr><td>C</td><td>Less than 2 months but more than 1 month.</td></tr> <tr><td>D</td><td>Less than 1 month.</td></tr> </table>                                                                                                                                                                                                                                                                                                       | A       | More than 3 months.                                                                                                                                            | B | Less than 3 months but more than 2 months.                                                                                | C | Less than 2 months but more than 1 month.                                                                                                                           | D                                                                                       | Less than 1 month.                                                                                  | <table border="1"> <tr><td>4</td></tr> <tr><td>8/3</td></tr> <tr><td>4/3</td></tr> <tr><td>0</td></tr> </table>       | 4                                                                                       | 8/3                                                                                                                             | 4/3 | 0 |   |   |   |
| A                                                                                                | More than 3 months.                                                                                                                                                                                                                                                                                                                                                                                                                                                                                                                                                           |         |                                                                                                                                                                |   |                                                                                                                           |   |                                                                                                                                                                     |                                                                                         |                                                                                                     |                                                                                                                       |                                                                                         |                                                                                                                                 |     |   |   |   |   |
| B                                                                                                | Less than 3 months but more than 2 months.                                                                                                                                                                                                                                                                                                                                                                                                                                                                                                                                    |         |                                                                                                                                                                |   |                                                                                                                           |   |                                                                                                                                                                     |                                                                                         |                                                                                                     |                                                                                                                       |                                                                                         |                                                                                                                                 |     |   |   |   |   |
| C                                                                                                | Less than 2 months but more than 1 month.                                                                                                                                                                                                                                                                                                                                                                                                                                                                                                                                     |         |                                                                                                                                                                |   |                                                                                                                           |   |                                                                                                                                                                     |                                                                                         |                                                                                                     |                                                                                                                       |                                                                                         |                                                                                                                                 |     |   |   |   |   |
| D                                                                                                | Less than 1 month.                                                                                                                                                                                                                                                                                                                                                                                                                                                                                                                                                            |         |                                                                                                                                                                |   |                                                                                                                           |   |                                                                                                                                                                     |                                                                                         |                                                                                                     |                                                                                                                       |                                                                                         |                                                                                                                                 |     |   |   |   |   |
| 4                                                                                                |                                                                                                                                                                                                                                                                                                                                                                                                                                                                                                                                                                               |         |                                                                                                                                                                |   |                                                                                                                           |   |                                                                                                                                                                     |                                                                                         |                                                                                                     |                                                                                                                       |                                                                                         |                                                                                                                                 |     |   |   |   |   |
| 8/3                                                                                              |                                                                                                                                                                                                                                                                                                                                                                                                                                                                                                                                                                               |         |                                                                                                                                                                |   |                                                                                                                           |   |                                                                                                                                                                     |                                                                                         |                                                                                                     |                                                                                                                       |                                                                                         |                                                                                                                                 |     |   |   |   |   |
| 4/3                                                                                              |                                                                                                                                                                                                                                                                                                                                                                                                                                                                                                                                                                               |         |                                                                                                                                                                |   |                                                                                                                           |   |                                                                                                                                                                     |                                                                                         |                                                                                                     |                                                                                                                       |                                                                                         |                                                                                                                                 |     |   |   |   |   |
| 0                                                                                                |                                                                                                                                                                                                                                                                                                                                                                                                                                                                                                                                                                               |         |                                                                                                                                                                |   |                                                                                                                           |   |                                                                                                                                                                     |                                                                                         |                                                                                                     |                                                                                                                       |                                                                                         |                                                                                                                                 |     |   |   |   |   |
| 7) Choose the inspection methods you use for inspecting acclimatization.                         | <table border="1"> <tr><td>A</td><td>Both ELISA kit and PCR.</td></tr> <tr><td>B</td><td>Either ELISA kit or PCR.</td></tr> <tr><td>C</td><td>None.</td></tr> </table>                                                                                                                                                                                                                                                                                                                                                                                                        | A       | Both ELISA kit and PCR.                                                                                                                                        | B | Either ELISA kit or PCR.                                                                                                  | C | None.                                                                                                                                                               | <table border="1"> <tr><td>4</td></tr> <tr><td>2</td></tr> <tr><td>0</td></tr> </table> | 4                                                                                                   | 2                                                                                                                     | 0                                                                                       |                                                                                                                                 |     |   |   |   |   |
| A                                                                                                | Both ELISA kit and PCR.                                                                                                                                                                                                                                                                                                                                                                                                                                                                                                                                                       |         |                                                                                                                                                                |   |                                                                                                                           |   |                                                                                                                                                                     |                                                                                         |                                                                                                     |                                                                                                                       |                                                                                         |                                                                                                                                 |     |   |   |   |   |
| B                                                                                                | Either ELISA kit or PCR.                                                                                                                                                                                                                                                                                                                                                                                                                                                                                                                                                      |         |                                                                                                                                                                |   |                                                                                                                           |   |                                                                                                                                                                     |                                                                                         |                                                                                                     |                                                                                                                       |                                                                                         |                                                                                                                                 |     |   |   |   |   |
| C                                                                                                | None.                                                                                                                                                                                                                                                                                                                                                                                                                                                                                                                                                                         |         |                                                                                                                                                                |   |                                                                                                                           |   |                                                                                                                                                                     |                                                                                         |                                                                                                     |                                                                                                                       |                                                                                         |                                                                                                                                 |     |   |   |   |   |
| 4                                                                                                |                                                                                                                                                                                                                                                                                                                                                                                                                                                                                                                                                                               |         |                                                                                                                                                                |   |                                                                                                                           |   |                                                                                                                                                                     |                                                                                         |                                                                                                     |                                                                                                                       |                                                                                         |                                                                                                                                 |     |   |   |   |   |
| 2                                                                                                |                                                                                                                                                                                                                                                                                                                                                                                                                                                                                                                                                                               |         |                                                                                                                                                                |   |                                                                                                                           |   |                                                                                                                                                                     |                                                                                         |                                                                                                     |                                                                                                                       |                                                                                         |                                                                                                                                 |     |   |   |   |   |
| 0                                                                                                |                                                                                                                                                                                                                                                                                                                                                                                                                                                                                                                                                                               |         |                                                                                                                                                                |   |                                                                                                                           |   |                                                                                                                                                                     |                                                                                         |                                                                                                     |                                                                                                                       |                                                                                         |                                                                                                                                 |     |   |   |   |   |
| <b>iii. Employee</b>                                                                             |                                                                                                                                                                                                                                                                                                                                                                                                                                                                                                                                                                               |         |                                                                                                                                                                |   |                                                                                                                           |   |                                                                                                                                                                     |                                                                                         |                                                                                                     |                                                                                                                       |                                                                                         |                                                                                                                                 |     |   |   |   |   |
| 8) Choose the entrance requirements for visitors.                                                | <table border="1"> <tr><td>A</td><td>Visitors are enforced to have shower in/out. The shower room has one-way access.</td></tr> <tr><td>B</td><td>Visitors are enforced to have shower in/out. The shower room <b>does not</b> have one-way access.</td></tr> <tr><td>C</td><td>Visitors are <b>not</b> enforced to have shower in/out but hands wash &amp; disinfection are required.</td></tr> <tr><td>D</td><td>No requirements.</td></tr> </table>                                                                                                                        | A       | Visitors are enforced to have shower in/out. The shower room has one-way access.                                                                               | B | Visitors are enforced to have shower in/out. The shower room <b>does not</b> have one-way access.                         | C | Visitors are <b>not</b> enforced to have shower in/out but hands wash & disinfection are required.                                                                  | D                                                                                       | No requirements.                                                                                    | <table border="1"> <tr><td>4</td></tr> <tr><td>8/3</td></tr> <tr><td>4/3</td></tr> <tr><td>0</td></tr> </table>       | 4                                                                                       | 8/3                                                                                                                             | 4/3 | 0 |   |   |   |
| A                                                                                                | Visitors are enforced to have shower in/out. The shower room has one-way access.                                                                                                                                                                                                                                                                                                                                                                                                                                                                                              |         |                                                                                                                                                                |   |                                                                                                                           |   |                                                                                                                                                                     |                                                                                         |                                                                                                     |                                                                                                                       |                                                                                         |                                                                                                                                 |     |   |   |   |   |
| B                                                                                                | Visitors are enforced to have shower in/out. The shower room <b>does not</b> have one-way access.                                                                                                                                                                                                                                                                                                                                                                                                                                                                             |         |                                                                                                                                                                |   |                                                                                                                           |   |                                                                                                                                                                     |                                                                                         |                                                                                                     |                                                                                                                       |                                                                                         |                                                                                                                                 |     |   |   |   |   |
| C                                                                                                | Visitors are <b>not</b> enforced to have shower in/out but hands wash & disinfection are required.                                                                                                                                                                                                                                                                                                                                                                                                                                                                            |         |                                                                                                                                                                |   |                                                                                                                           |   |                                                                                                                                                                     |                                                                                         |                                                                                                     |                                                                                                                       |                                                                                         |                                                                                                                                 |     |   |   |   |   |
| D                                                                                                | No requirements.                                                                                                                                                                                                                                                                                                                                                                                                                                                                                                                                                              |         |                                                                                                                                                                |   |                                                                                                                           |   |                                                                                                                                                                     |                                                                                         |                                                                                                     |                                                                                                                       |                                                                                         |                                                                                                                                 |     |   |   |   |   |
| 4                                                                                                |                                                                                                                                                                                                                                                                                                                                                                                                                                                                                                                                                                               |         |                                                                                                                                                                |   |                                                                                                                           |   |                                                                                                                                                                     |                                                                                         |                                                                                                     |                                                                                                                       |                                                                                         |                                                                                                                                 |     |   |   |   |   |
| 8/3                                                                                              |                                                                                                                                                                                                                                                                                                                                                                                                                                                                                                                                                                               |         |                                                                                                                                                                |   |                                                                                                                           |   |                                                                                                                                                                     |                                                                                         |                                                                                                     |                                                                                                                       |                                                                                         |                                                                                                                                 |     |   |   |   |   |
| 4/3                                                                                              |                                                                                                                                                                                                                                                                                                                                                                                                                                                                                                                                                                               |         |                                                                                                                                                                |   |                                                                                                                           |   |                                                                                                                                                                     |                                                                                         |                                                                                                     |                                                                                                                       |                                                                                         |                                                                                                                                 |     |   |   |   |   |
| 0                                                                                                |                                                                                                                                                                                                                                                                                                                                                                                                                                                                                                                                                                               |         |                                                                                                                                                                |   |                                                                                                                           |   |                                                                                                                                                                     |                                                                                         |                                                                                                     |                                                                                                                       |                                                                                         |                                                                                                                                 |     |   |   |   |   |
| 9) Choose the hygienic requirements for clothing and shoes change.                               | <table border="1"> <tr><td>A</td><td>Disinfect shoes before entering and change to farm specific clothing and shoes.</td></tr> <tr><td>B</td><td>No disinfection of shoes before entering but change to farm specific clothing and shoes. Choose B if you use shoes cover.</td></tr> <tr><td>C</td><td>No requirements for clothing and shoes change.</td></tr> </table>                                                                                                                                                                                                      | A       | Disinfect shoes before entering and change to farm specific clothing and shoes.                                                                                | B | No disinfection of shoes before entering but change to farm specific clothing and shoes. Choose B if you use shoes cover. | C | No requirements for clothing and shoes change.                                                                                                                      | <table border="1"> <tr><td>4</td></tr> <tr><td>2</td></tr> <tr><td>0</td></tr> </table> | 4                                                                                                   | 2                                                                                                                     | 0                                                                                       |                                                                                                                                 |     |   |   |   |   |
| A                                                                                                | Disinfect shoes before entering and change to farm specific clothing and shoes.                                                                                                                                                                                                                                                                                                                                                                                                                                                                                               |         |                                                                                                                                                                |   |                                                                                                                           |   |                                                                                                                                                                     |                                                                                         |                                                                                                     |                                                                                                                       |                                                                                         |                                                                                                                                 |     |   |   |   |   |
| B                                                                                                | No disinfection of shoes before entering but change to farm specific clothing and shoes. Choose B if you use shoes cover.                                                                                                                                                                                                                                                                                                                                                                                                                                                     |         |                                                                                                                                                                |   |                                                                                                                           |   |                                                                                                                                                                     |                                                                                         |                                                                                                     |                                                                                                                       |                                                                                         |                                                                                                                                 |     |   |   |   |   |
| C                                                                                                | No requirements for clothing and shoes change.                                                                                                                                                                                                                                                                                                                                                                                                                                                                                                                                |         |                                                                                                                                                                |   |                                                                                                                           |   |                                                                                                                                                                     |                                                                                         |                                                                                                     |                                                                                                                       |                                                                                         |                                                                                                                                 |     |   |   |   |   |
| 4                                                                                                |                                                                                                                                                                                                                                                                                                                                                                                                                                                                                                                                                                               |         |                                                                                                                                                                |   |                                                                                                                           |   |                                                                                                                                                                     |                                                                                         |                                                                                                     |                                                                                                                       |                                                                                         |                                                                                                                                 |     |   |   |   |   |
| 2                                                                                                |                                                                                                                                                                                                                                                                                                                                                                                                                                                                                                                                                                               |         |                                                                                                                                                                |   |                                                                                                                           |   |                                                                                                                                                                     |                                                                                         |                                                                                                     |                                                                                                                       |                                                                                         |                                                                                                                                 |     |   |   |   |   |
| 0                                                                                                |                                                                                                                                                                                                                                                                                                                                                                                                                                                                                                                                                                               |         |                                                                                                                                                                |   |                                                                                                                           |   |                                                                                                                                                                     |                                                                                         |                                                                                                     |                                                                                                                       |                                                                                         |                                                                                                                                 |     |   |   |   |   |
| <b>iv. Transport Vehicles</b>                                                                    |                                                                                                                                                                                                                                                                                                                                                                                                                                                                                                                                                                               |         |                                                                                                                                                                |   |                                                                                                                           |   |                                                                                                                                                                     |                                                                                         |                                                                                                     |                                                                                                                       |                                                                                         |                                                                                                                                 |     |   |   |   |   |
| 10) Choose the status of transport vehicles delivering fattening pigs to slaughter house.        | <table border="1"> <tr><td>A</td><td>The transport vehicles are used privately for delivering purpose.</td></tr> <tr><td>B</td><td>The transport vehicles are used privately but not only for delivering purpose.</td></tr> <tr><td>C</td><td>The transport vehicles are shared with other single farm per day.</td></tr> <tr><td>D</td><td>The transport vehicles are shared with other several farms per day but loaded individually.</td></tr> <tr><td>E</td><td>The transport vehicles are shared with other several farms per day and loaded jointly.</td></tr> </table> | A       | The transport vehicles are used privately for delivering purpose.                                                                                              | B | The transport vehicles are used privately but not only for delivering purpose.                                            | C | The transport vehicles are shared with other single farm per day.                                                                                                   | D                                                                                       | The transport vehicles are shared with other several farms per day but loaded individually.         | E                                                                                                                     | The transport vehicles are shared with other several farms per day and loaded jointly.  | <table border="1"> <tr><td>4</td></tr> <tr><td>3</td></tr> <tr><td>2</td></tr> <tr><td>1</td></tr> <tr><td>0</td></tr> </table> | 4   | 3 | 2 | 1 | 0 |
| A                                                                                                | The transport vehicles are used privately for delivering purpose.                                                                                                                                                                                                                                                                                                                                                                                                                                                                                                             |         |                                                                                                                                                                |   |                                                                                                                           |   |                                                                                                                                                                     |                                                                                         |                                                                                                     |                                                                                                                       |                                                                                         |                                                                                                                                 |     |   |   |   |   |
| B                                                                                                | The transport vehicles are used privately but not only for delivering purpose.                                                                                                                                                                                                                                                                                                                                                                                                                                                                                                |         |                                                                                                                                                                |   |                                                                                                                           |   |                                                                                                                                                                     |                                                                                         |                                                                                                     |                                                                                                                       |                                                                                         |                                                                                                                                 |     |   |   |   |   |
| C                                                                                                | The transport vehicles are shared with other single farm per day.                                                                                                                                                                                                                                                                                                                                                                                                                                                                                                             |         |                                                                                                                                                                |   |                                                                                                                           |   |                                                                                                                                                                     |                                                                                         |                                                                                                     |                                                                                                                       |                                                                                         |                                                                                                                                 |     |   |   |   |   |
| D                                                                                                | The transport vehicles are shared with other several farms per day but loaded individually.                                                                                                                                                                                                                                                                                                                                                                                                                                                                                   |         |                                                                                                                                                                |   |                                                                                                                           |   |                                                                                                                                                                     |                                                                                         |                                                                                                     |                                                                                                                       |                                                                                         |                                                                                                                                 |     |   |   |   |   |
| E                                                                                                | The transport vehicles are shared with other several farms per day and loaded jointly.                                                                                                                                                                                                                                                                                                                                                                                                                                                                                        |         |                                                                                                                                                                |   |                                                                                                                           |   |                                                                                                                                                                     |                                                                                         |                                                                                                     |                                                                                                                       |                                                                                         |                                                                                                                                 |     |   |   |   |   |
| 4                                                                                                |                                                                                                                                                                                                                                                                                                                                                                                                                                                                                                                                                                               |         |                                                                                                                                                                |   |                                                                                                                           |   |                                                                                                                                                                     |                                                                                         |                                                                                                     |                                                                                                                       |                                                                                         |                                                                                                                                 |     |   |   |   |   |
| 3                                                                                                |                                                                                                                                                                                                                                                                                                                                                                                                                                                                                                                                                                               |         |                                                                                                                                                                |   |                                                                                                                           |   |                                                                                                                                                                     |                                                                                         |                                                                                                     |                                                                                                                       |                                                                                         |                                                                                                                                 |     |   |   |   |   |
| 2                                                                                                |                                                                                                                                                                                                                                                                                                                                                                                                                                                                                                                                                                               |         |                                                                                                                                                                |   |                                                                                                                           |   |                                                                                                                                                                     |                                                                                         |                                                                                                     |                                                                                                                       |                                                                                         |                                                                                                                                 |     |   |   |   |   |
| 1                                                                                                |                                                                                                                                                                                                                                                                                                                                                                                                                                                                                                                                                                               |         |                                                                                                                                                                |   |                                                                                                                           |   |                                                                                                                                                                     |                                                                                         |                                                                                                     |                                                                                                                       |                                                                                         |                                                                                                                                 |     |   |   |   |   |
| 0                                                                                                |                                                                                                                                                                                                                                                                                                                                                                                                                                                                                                                                                                               |         |                                                                                                                                                                |   |                                                                                                                           |   |                                                                                                                                                                     |                                                                                         |                                                                                                     |                                                                                                                       |                                                                                         |                                                                                                                                 |     |   |   |   |   |
| 11) Choose the status of cleaning procedure for transport vehicles.                              | <table border="1"> <tr><td>A</td><td>The vehicles have first "wash and disinfection" at slaughter house and have another intensive "wash, disinfection and <b>drying</b>" at own farm.</td></tr> <tr><td>B</td><td>We follow the above procedure but incomplete.</td></tr> <tr><td>C</td><td>The vehicles have first "wash" at slaughter house and have another "wash and disinfection" at own farm."</td></tr> <tr><td>D</td><td>No cleaning procedure is taken.</td></tr> </table>                                                                                          | A       | The vehicles have first "wash and disinfection" at slaughter house and have another intensive "wash, disinfection and <b>drying</b> " at own farm.             | B | We follow the above procedure but incomplete.                                                                             | C | The vehicles have first "wash" at slaughter house and have another "wash and disinfection" at own farm."                                                            | D                                                                                       | No cleaning procedure is taken.                                                                     | <table border="1"> <tr><td>4</td></tr> <tr><td>8/3</td></tr> <tr><td>4/3</td></tr> <tr><td>0</td></tr> </table>       | 4                                                                                       | 8/3                                                                                                                             | 4/3 | 0 |   |   |   |
| A                                                                                                | The vehicles have first "wash and disinfection" at slaughter house and have another intensive "wash, disinfection and <b>drying</b> " at own farm.                                                                                                                                                                                                                                                                                                                                                                                                                            |         |                                                                                                                                                                |   |                                                                                                                           |   |                                                                                                                                                                     |                                                                                         |                                                                                                     |                                                                                                                       |                                                                                         |                                                                                                                                 |     |   |   |   |   |
| B                                                                                                | We follow the above procedure but incomplete.                                                                                                                                                                                                                                                                                                                                                                                                                                                                                                                                 |         |                                                                                                                                                                |   |                                                                                                                           |   |                                                                                                                                                                     |                                                                                         |                                                                                                     |                                                                                                                       |                                                                                         |                                                                                                                                 |     |   |   |   |   |
| C                                                                                                | The vehicles have first "wash" at slaughter house and have another "wash and disinfection" at own farm."                                                                                                                                                                                                                                                                                                                                                                                                                                                                      |         |                                                                                                                                                                |   |                                                                                                                           |   |                                                                                                                                                                     |                                                                                         |                                                                                                     |                                                                                                                       |                                                                                         |                                                                                                                                 |     |   |   |   |   |
| D                                                                                                | No cleaning procedure is taken.                                                                                                                                                                                                                                                                                                                                                                                                                                                                                                                                               |         |                                                                                                                                                                |   |                                                                                                                           |   |                                                                                                                                                                     |                                                                                         |                                                                                                     |                                                                                                                       |                                                                                         |                                                                                                                                 |     |   |   |   |   |
| 4                                                                                                |                                                                                                                                                                                                                                                                                                                                                                                                                                                                                                                                                                               |         |                                                                                                                                                                |   |                                                                                                                           |   |                                                                                                                                                                     |                                                                                         |                                                                                                     |                                                                                                                       |                                                                                         |                                                                                                                                 |     |   |   |   |   |
| 8/3                                                                                              |                                                                                                                                                                                                                                                                                                                                                                                                                                                                                                                                                                               |         |                                                                                                                                                                |   |                                                                                                                           |   |                                                                                                                                                                     |                                                                                         |                                                                                                     |                                                                                                                       |                                                                                         |                                                                                                                                 |     |   |   |   |   |
| 4/3                                                                                              |                                                                                                                                                                                                                                                                                                                                                                                                                                                                                                                                                                               |         |                                                                                                                                                                |   |                                                                                                                           |   |                                                                                                                                                                     |                                                                                         |                                                                                                     |                                                                                                                       |                                                                                         |                                                                                                                                 |     |   |   |   |   |
| 0                                                                                                |                                                                                                                                                                                                                                                                                                                                                                                                                                                                                                                                                                               |         |                                                                                                                                                                |   |                                                                                                                           |   |                                                                                                                                                                     |                                                                                         |                                                                                                     |                                                                                                                       |                                                                                         |                                                                                                                                 |     |   |   |   |   |
| 12) Choose the requirements for vehicle driver after delivering.                                 | <table border="1"> <tr><td>A</td><td>The driver is engaged in delivering only or is enforced one night down time (pig contact free period).</td></tr> <tr><td>B</td><td>The driver is enforced to have shower in before entering farm on the day.</td></tr> <tr><td>C</td><td>The driver is not enforced to have shower in but to change clothing and shoes.</td></tr> <tr><td>D</td><td>No requirements.</td></tr> </table>                                                                                                                                                  | A       | The driver is engaged in delivering only or is enforced one night down time (pig contact free period).                                                         | B | The driver is enforced to have shower in before entering farm on the day.                                                 | C | The driver is not enforced to have shower in but to change clothing and shoes.                                                                                      | D                                                                                       | No requirements.                                                                                    | <table border="1"> <tr><td>4</td></tr> <tr><td>8/3</td></tr> <tr><td>4/3</td></tr> <tr><td>0</td></tr> </table>       | 4                                                                                       | 8/3                                                                                                                             | 4/3 | 0 |   |   |   |
| A                                                                                                | The driver is engaged in delivering only or is enforced one night down time (pig contact free period).                                                                                                                                                                                                                                                                                                                                                                                                                                                                        |         |                                                                                                                                                                |   |                                                                                                                           |   |                                                                                                                                                                     |                                                                                         |                                                                                                     |                                                                                                                       |                                                                                         |                                                                                                                                 |     |   |   |   |   |
| B                                                                                                | The driver is enforced to have shower in before entering farm on the day.                                                                                                                                                                                                                                                                                                                                                                                                                                                                                                     |         |                                                                                                                                                                |   |                                                                                                                           |   |                                                                                                                                                                     |                                                                                         |                                                                                                     |                                                                                                                       |                                                                                         |                                                                                                                                 |     |   |   |   |   |
| C                                                                                                | The driver is not enforced to have shower in but to change clothing and shoes.                                                                                                                                                                                                                                                                                                                                                                                                                                                                                                |         |                                                                                                                                                                |   |                                                                                                                           |   |                                                                                                                                                                     |                                                                                         |                                                                                                     |                                                                                                                       |                                                                                         |                                                                                                                                 |     |   |   |   |   |
| D                                                                                                | No requirements.                                                                                                                                                                                                                                                                                                                                                                                                                                                                                                                                                              |         |                                                                                                                                                                |   |                                                                                                                           |   |                                                                                                                                                                     |                                                                                         |                                                                                                     |                                                                                                                       |                                                                                         |                                                                                                                                 |     |   |   |   |   |
| 4                                                                                                |                                                                                                                                                                                                                                                                                                                                                                                                                                                                                                                                                                               |         |                                                                                                                                                                |   |                                                                                                                           |   |                                                                                                                                                                     |                                                                                         |                                                                                                     |                                                                                                                       |                                                                                         |                                                                                                                                 |     |   |   |   |   |
| 8/3                                                                                              |                                                                                                                                                                                                                                                                                                                                                                                                                                                                                                                                                                               |         |                                                                                                                                                                |   |                                                                                                                           |   |                                                                                                                                                                     |                                                                                         |                                                                                                     |                                                                                                                       |                                                                                         |                                                                                                                                 |     |   |   |   |   |
| 4/3                                                                                              |                                                                                                                                                                                                                                                                                                                                                                                                                                                                                                                                                                               |         |                                                                                                                                                                |   |                                                                                                                           |   |                                                                                                                                                                     |                                                                                         |                                                                                                     |                                                                                                                       |                                                                                         |                                                                                                                                 |     |   |   |   |   |
| 0                                                                                                |                                                                                                                                                                                                                                                                                                                                                                                                                                                                                                                                                                               |         |                                                                                                                                                                |   |                                                                                                                           |   |                                                                                                                                                                     |                                                                                         |                                                                                                     |                                                                                                                       |                                                                                         |                                                                                                                                 |     |   |   |   |   |
| 13) Choose the status of transport vehicle among own farm.                                       | <table border="1"> <tr><td>A</td><td>The transport vehicles are used privately .</td></tr> <tr><td>B</td><td>The transport vehicles are shared with other farms and require cleaning, disinfection and drying procedure.</td></tr> <tr><td>C</td><td>The transport vehicles are shared with other farms without rules.</td></tr> </table>                                                                                                                                                                                                                                     | A       | The transport vehicles are used privately .                                                                                                                    | B | The transport vehicles are shared with other farms and require cleaning, disinfection and drying procedure.               | C | The transport vehicles are shared with other farms without rules.                                                                                                   | <table border="1"> <tr><td>4</td></tr> <tr><td>2</td></tr> <tr><td>0</td></tr> </table> | 4                                                                                                   | 2                                                                                                                     | 0                                                                                       |                                                                                                                                 |     |   |   |   |   |
| A                                                                                                | The transport vehicles are used privately .                                                                                                                                                                                                                                                                                                                                                                                                                                                                                                                                   |         |                                                                                                                                                                |   |                                                                                                                           |   |                                                                                                                                                                     |                                                                                         |                                                                                                     |                                                                                                                       |                                                                                         |                                                                                                                                 |     |   |   |   |   |
| B                                                                                                | The transport vehicles are shared with other farms and require cleaning, disinfection and drying procedure.                                                                                                                                                                                                                                                                                                                                                                                                                                                                   |         |                                                                                                                                                                |   |                                                                                                                           |   |                                                                                                                                                                     |                                                                                         |                                                                                                     |                                                                                                                       |                                                                                         |                                                                                                                                 |     |   |   |   |   |
| C                                                                                                | The transport vehicles are shared with other farms without rules.                                                                                                                                                                                                                                                                                                                                                                                                                                                                                                             |         |                                                                                                                                                                |   |                                                                                                                           |   |                                                                                                                                                                     |                                                                                         |                                                                                                     |                                                                                                                       |                                                                                         |                                                                                                                                 |     |   |   |   |   |
| 4                                                                                                |                                                                                                                                                                                                                                                                                                                                                                                                                                                                                                                                                                               |         |                                                                                                                                                                |   |                                                                                                                           |   |                                                                                                                                                                     |                                                                                         |                                                                                                     |                                                                                                                       |                                                                                         |                                                                                                                                 |     |   |   |   |   |
| 2                                                                                                |                                                                                                                                                                                                                                                                                                                                                                                                                                                                                                                                                                               |         |                                                                                                                                                                |   |                                                                                                                           |   |                                                                                                                                                                     |                                                                                         |                                                                                                     |                                                                                                                       |                                                                                         |                                                                                                                                 |     |   |   |   |   |
| 0                                                                                                |                                                                                                                                                                                                                                                                                                                                                                                                                                                                                                                                                                               |         |                                                                                                                                                                |   |                                                                                                                           |   |                                                                                                                                                                     |                                                                                         |                                                                                                     |                                                                                                                       |                                                                                         |                                                                                                                                 |     |   |   |   |   |
| <b>v. Manure &amp; Carcass</b>                                                                   |                                                                                                                                                                                                                                                                                                                                                                                                                                                                                                                                                                               |         |                                                                                                                                                                |   |                                                                                                                           |   |                                                                                                                                                                     |                                                                                         |                                                                                                     |                                                                                                                       |                                                                                         |                                                                                                                                 |     |   |   |   |   |
| 14) Choose the status of collection storage for dead body.                                       | <table border="1"> <tr><td>A</td><td>The transport vehicles drive to <b>private</b> collection storage settled <b>outside</b> of the sanitary area or use private incinerator to dispose dead body.</td></tr> <tr><td>B</td><td>The transport vehicle drive to <b>shared</b> collection storage <b>outside</b> of the sanitary areas.</td></tr> <tr><td>C</td><td>The transport vehicle drive into collection storage settled inside of the sanitary area no matter private use or shared without loading dead body from other farms.</td></tr> </table>                      | A       | The transport vehicles drive to <b>private</b> collection storage settled <b>outside</b> of the sanitary area or use private incinerator to dispose dead body. | B | The transport vehicle drive to <b>shared</b> collection storage <b>outside</b> of the sanitary areas.                     | C | The transport vehicle drive into collection storage settled inside of the sanitary area no matter private use or shared without loading dead body from other farms. | <table border="1"> <tr><td>4</td></tr> <tr><td>3</td></tr> <tr><td>2</td></tr> </table> | 4                                                                                                   | 3                                                                                                                     | 2                                                                                       |                                                                                                                                 |     |   |   |   |   |
| A                                                                                                | The transport vehicles drive to <b>private</b> collection storage settled <b>outside</b> of the sanitary area or use private incinerator to dispose dead body.                                                                                                                                                                                                                                                                                                                                                                                                                |         |                                                                                                                                                                |   |                                                                                                                           |   |                                                                                                                                                                     |                                                                                         |                                                                                                     |                                                                                                                       |                                                                                         |                                                                                                                                 |     |   |   |   |   |
| B                                                                                                | The transport vehicle drive to <b>shared</b> collection storage <b>outside</b> of the sanitary areas.                                                                                                                                                                                                                                                                                                                                                                                                                                                                         |         |                                                                                                                                                                |   |                                                                                                                           |   |                                                                                                                                                                     |                                                                                         |                                                                                                     |                                                                                                                       |                                                                                         |                                                                                                                                 |     |   |   |   |   |
| C                                                                                                | The transport vehicle drive into collection storage settled inside of the sanitary area no matter private use or shared without loading dead body from other farms.                                                                                                                                                                                                                                                                                                                                                                                                           |         |                                                                                                                                                                |   |                                                                                                                           |   |                                                                                                                                                                     |                                                                                         |                                                                                                     |                                                                                                                       |                                                                                         |                                                                                                                                 |     |   |   |   |   |
| 4                                                                                                |                                                                                                                                                                                                                                                                                                                                                                                                                                                                                                                                                                               |         |                                                                                                                                                                |   |                                                                                                                           |   |                                                                                                                                                                     |                                                                                         |                                                                                                     |                                                                                                                       |                                                                                         |                                                                                                                                 |     |   |   |   |   |
| 3                                                                                                |                                                                                                                                                                                                                                                                                                                                                                                                                                                                                                                                                                               |         |                                                                                                                                                                |   |                                                                                                                           |   |                                                                                                                                                                     |                                                                                         |                                                                                                     |                                                                                                                       |                                                                                         |                                                                                                                                 |     |   |   |   |   |
| 2                                                                                                |                                                                                                                                                                                                                                                                                                                                                                                                                                                                                                                                                                               |         |                                                                                                                                                                |   |                                                                                                                           |   |                                                                                                                                                                     |                                                                                         |                                                                                                     |                                                                                                                       |                                                                                         |                                                                                                                                 |     |   |   |   |   |

|                                                                                                                |   |                                                                                                                                                                          |     |
|----------------------------------------------------------------------------------------------------------------|---|--------------------------------------------------------------------------------------------------------------------------------------------------------------------------|-----|
|                                                                                                                | D | The transport vehicle drive into collection storage settled <b>inside</b> of the sanitary area no matter private use or shared, with loading dead body from other farms. | 1   |
|                                                                                                                | E | Not applicable (N/A) to above statements.                                                                                                                                | 0   |
| 15) Choose the status of transport vehicle used for carrying dead animals between pen and collection storage.  | A | The transport vehicle are used privately for carrying dead animals to storage only.                                                                                      | 4   |
|                                                                                                                | B | The transport vehicle are used privately but for multiple purpose.                                                                                                       | 8/3 |
|                                                                                                                | C | The transport vehicles are shared with other several farms but loaded individually.                                                                                      | 4/3 |
|                                                                                                                | D | The transport vehicles are shared with other several farms and loaded jointly.                                                                                           | 0   |
| 16) Choose the status of cleaning procedure for transport vehicles used to carry dead animals inside the farm. | A | The transport vehicles are washed and disinfected properly.                                                                                                              | 4   |
|                                                                                                                | B | No cleaning procedure is taken or unknown.                                                                                                                               | 0   |
| 17) Choose the requirements for vehicle driver after transporting.                                             | A | The driver is engaged in delivering only or is enforced one night down time (pig contact free period).                                                                   | 4   |
|                                                                                                                | B | The driver is enforced to have shower in before entering farm on the day.                                                                                                | 8/3 |
|                                                                                                                | C | The driver is not enforced to have shower in but to change clothing and shoes.                                                                                           | 4/3 |
|                                                                                                                | D | No requirements.                                                                                                                                                         | 0   |
| 18) Choose the manure composting facility.                                                                     | A | We have private composting facility and use private vehicle to transport manure.                                                                                         | 4   |
|                                                                                                                | B | We share composting facility with others but use private vehicle to transport manure.                                                                                    | 2   |
|                                                                                                                | C | We share both composting facility and vehicle to transport manure.                                                                                                       | 0   |
| <b>vi. Vermin Controls</b>                                                                                     |   |                                                                                                                                                                          |     |
| 19) Choose the rodent control in your farm.                                                                    | A | No trace of rodents are observed in our farm.                                                                                                                            | 4   |
|                                                                                                                | B | Regular deratizations are made in our farm.                                                                                                                              | 8/3 |
|                                                                                                                | C | Indeterminate deratizations are made in our farm.                                                                                                                        | 4/3 |
|                                                                                                                | D | No deratizations are made despite the trace of rodents.                                                                                                                  | 0   |
| 20) Choose the wild birds control in your farm.                                                                | A | Our farm is fully equipped with bird preventing net and overhauled regularly.                                                                                            | 4   |
|                                                                                                                | B | Our farm is partly equipped with bird preventing net.                                                                                                                    | 2   |
|                                                                                                                | C | No measurements against wild birds.                                                                                                                                      | 0   |
| <b>vii. Farm Contractors</b>                                                                                   |   |                                                                                                                                                                          |     |
| 21) Choose the entrance requirements for farm contractors entering stables.                                    | A | Contractors are obliged to have down time and shower in.                                                                                                                 | 4   |
|                                                                                                                | B | Contractors are obliged to have down time and change clothing and shoes.                                                                                                 | 8/3 |
|                                                                                                                | C | Contractors are obliged to have down time but no requirements for clothing and shoes,                                                                                    | 4/3 |
|                                                                                                                | D | No requirements nor entering record.                                                                                                                                     | 0   |
| 22) Choose the requirements for materials and tools to enter.                                                  | A | Fumigation is required or farm specific materials and tools are used.                                                                                                    | 4   |
|                                                                                                                | B | Disinfection other than fumigation is required.                                                                                                                          | 2   |
|                                                                                                                | C | No requirements.                                                                                                                                                         | 0   |
| <b>III.+B118:E195 Internal Biosecurity</b>                                                                     |   |                                                                                                                                                                          |     |
| <b>viii. Pen Layouts</b>                                                                                       |   |                                                                                                                                                                          |     |
| 23) Choose the status of pen independence.                                                                     | A | All the growth stages are independent by stables.                                                                                                                        | 4   |
|                                                                                                                | B | All the growth stages are independent by pen with independent underfloor.                                                                                                | 3   |
|                                                                                                                | C | All the growth stages are independent by crate with joint underfloor.                                                                                                    | 2   |
|                                                                                                                | D | Growth stages are mixed in the stables but partitioned by walls.                                                                                                         | 1   |
|                                                                                                                | E | Growth stages are mixed in the stables without physical separation.                                                                                                      | 0   |
| 24) Choose the status of site independence.                                                                    | A | The sites are independent by production stages.                                                                                                                          | 4   |
|                                                                                                                | B | All the production stages are gathered in the single site but settled in order of growth stages.                                                                         | 2   |
|                                                                                                                | C | All the production stages are gathered in the single site and settled randomly among growth stages.                                                                      | 0   |
| <b>ix. Pig-flows</b>                                                                                           |   |                                                                                                                                                                          |     |
| 25) Choose the status of all-in all-out system at farrowing stage.                                             | A | All-in all-out by each stable unit.                                                                                                                                      | 4   |
|                                                                                                                | B | All-in all-out by each pen unit.                                                                                                                                         | 8/3 |
|                                                                                                                | C | We have continuous flow in order of expected date of delivery.                                                                                                           | 4/3 |
|                                                                                                                | D | We have continuous flow and mixed without order.                                                                                                                         | 0   |
| 26) Choose the status of all-in all-out system at weaning stage.                                               | A | All-in all-out by each stable unit.                                                                                                                                      | 4   |
|                                                                                                                | B | All-in all-out by each pen unit.                                                                                                                                         | 8/3 |
|                                                                                                                | C | We have continuous flow in order of age.                                                                                                                                 | 4/3 |
|                                                                                                                | D | We have continuous flow and mixed without order.                                                                                                                         | 0   |
| 27) Choose the status of all-in all-out system at fattening stage.                                             | A | All-in all-out by each stable unit.                                                                                                                                      | 4   |
|                                                                                                                | B | All-in all-out by each pen unit.                                                                                                                                         | 8/3 |
|                                                                                                                | C | We have continuous flow in order of age.                                                                                                                                 | 4/3 |
|                                                                                                                | D | We have continuous flow and mixed without order.                                                                                                                         | 0   |
| 28) Choose the status of all-in all-out system at quarantine period for gilts.                                 | A | All-in all-out by each stable unit.                                                                                                                                      | 4   |
|                                                                                                                | B | All-in all-out by each pen unit.                                                                                                                                         | 8/3 |
|                                                                                                                | C | We have continuous flow in order of age.                                                                                                                                 | 4/3 |
|                                                                                                                | D | We have continuous flow and mixed without order.                                                                                                                         | 0   |
| 29) Choose the status of isolation and culling of sick animals.                                                | A | Both active isolation and culling are operated.                                                                                                                          | 4   |
|                                                                                                                | B | Active isolation but inactive culling are operated.                                                                                                                      | 2   |
|                                                                                                                | C | Both inactive isolation and culling are operated.                                                                                                                        | 0   |
| 30) Choose the status of boomerang fattening pigs.                                                             | A | We completely all-out the fattening pigs.                                                                                                                                | 4   |
|                                                                                                                | B | We have specific stable for boomerang pigs.                                                                                                                              | 8/3 |
|                                                                                                                | C | We return to the stable with other batch without direct contact by settling specific pen for boomerang pigs.                                                             | 4/3 |

|   |                                                                                |   |
|---|--------------------------------------------------------------------------------|---|
| D | We return to the stable with other batch and mixed with the different litters. | 0 |
|---|--------------------------------------------------------------------------------|---|

**x. Cleaning & Disinfection**

|                                                                   |   |                                                                                           |     |
|-------------------------------------------------------------------|---|-------------------------------------------------------------------------------------------|-----|
| 31) Choose the status of cleaning at farrowing pen.               | A | Organic substances are all washed out and counter checked by supervisor.                  | 4   |
|                                                                   | B | Organic substances are all washed out but <b>no</b> counter check by supervisor.          | 8/3 |
|                                                                   | C | Organic substances are often remain behind the facilities.                                | 4/3 |
|                                                                   | D | We do not regularly wash farrowing pen.                                                   | 0   |
| 32) Choose the status of cleaning at weaning pen.                 | A | Organic substances are all washed out and counter checked by supervisor.                  | 4   |
|                                                                   | B | Organic substances are all washed out but <b>no</b> counter check by supervisor.          | 8/3 |
|                                                                   | C | Organic substances are often remain behind the facilities.                                | 4/3 |
|                                                                   | D | We do not regularly wash weaning pen.                                                     | 0   |
| 33) Choose the status of cleaning at fattening pen.               | A | Organic substances are all washed out and counter checked by supervisor.                  | 4   |
|                                                                   | B | Organic substances are all washed out but <b>no</b> counter check by supervisor.          | 8/3 |
|                                                                   | C | Organic substances are often remain behind the facilities.                                | 4/3 |
|                                                                   | D | We do not regularly wash fattening pen.                                                   | 0   |
| 34) Choose the status of disinfection procedure at farrowing pen. | A | We use aldehydes, hypochlorite or foam solution of strong-alkaline benzalkonium chloride. | 4   |
|                                                                   | B | We use other solutions mentioned above.                                                   | 8/3 |
|                                                                   | C | We rarely follow the instructions of disinfectant dosage                                  | 4/3 |
|                                                                   | D | We use no disinfectant.                                                                   | 0   |
| 35) Choose the drying period for farrowing pen.                   | A | More than 1 week.                                                                         | 4   |
|                                                                   | B | Less than 1 week but recharge sows after confirming drying state.                         | 8/3 |
|                                                                   | C | Less than 1 week and recharge sows without confirming drying state.                       | 4/3 |
|                                                                   | D | Recharge sows at the same day of discharge or recharge without drying.                    | 0   |
| 36) Choose the status of disinfection procedure at weaning pen.   | A | We use aldehydes, hypochlorite or foam solution of strong-alkaline benzalkonium chloride. | 4   |
|                                                                   | B | We use other solutions mentioned above.                                                   | 8/3 |
|                                                                   | C | We rarely follow the instructions of disinfectant dosage.                                 | 4/3 |
|                                                                   | D | We use no disinfectant.                                                                   | 0   |
| 37) Choose the drying period for weaning pen.                     | A | More than 1 week.                                                                         | 4   |
|                                                                   | B | Less than 1 week but recharge weaners after confirming drying state.                      | 8/3 |
|                                                                   | C | Less than 1 week and recharge weaners without confirming drying state.                    | 4/3 |
|                                                                   | D | Recharge weaners at the same day of discharge or recharge without drying.                 | 0   |
| 38) Choose the status of disinfection procedure at fattening pen. | A | We use aldehydes, hypochlorite or foam solution of strong-alkaline benzalkonium chloride. | 4   |
|                                                                   | B | We use other solutions mentioned above.                                                   | 8/3 |
|                                                                   | C | We rarely follow the instructions of disinfectant dosage                                  | 4/3 |
|                                                                   | D | We use no disinfectant.                                                                   | 0   |
| 39) Choose the drying period for fattening pen.                   | A | More than 1 week.                                                                         | 4   |
|                                                                   | B | Less than 1 week but recharge fattening pig after confirming drying state.                | 8/3 |
|                                                                   | C | Less than 1 week and recharge fattening pig without confirming drying state.              | 4/3 |
|                                                                   | D | Recharge fattening pigs at the same day of discharge or recharge without drying.          | 0   |

**xi. Employee**

|                                                           |   |                            |     |
|-----------------------------------------------------------|---|----------------------------|-----|
| 40) Choose the frequency of changing shoes.               | A | Change every pen.          | 4   |
|                                                           | B | Change every stable.       | 8/3 |
|                                                           | C | Change every growth stage. | 4/3 |
|                                                           | D | No exchange.               | 0   |
| 41) Choose the frequency of changing clothing and globes. | A | Change every pen.          | 4   |
|                                                           | B | Change every stable.       | 8/3 |
|                                                           | C | Change every growth stage. | 4/3 |
|                                                           | D | No exchange.               | 0   |

**xii. Injection Needles**

|                                                                     |   |                                                                                 |     |
|---------------------------------------------------------------------|---|---------------------------------------------------------------------------------|-----|
| 42) Choose the frequency of changing injection needles for sows.    | A | One for one sow.                                                                | 4   |
|                                                                     | B | We use jet injector.                                                            | 2   |
|                                                                     | C | No exchange.                                                                    | 0   |
| 43) Choose the frequency of changing injection needles for weaners. | A | We use jet injector or at least one for one litter.                             | 4   |
|                                                                     | B | One for single pen or single batch.                                             | 2   |
|                                                                     | C | No exchange.                                                                    | 0   |
| 44) Choose the frequency of changing injection needles for piglets. | A | We use jet injector or at least one for less than 10 piglets in the single pen. | 4   |
|                                                                     | B | One for more than 10 piglets in the single pen.                                 | 8/3 |
|                                                                     | C | One for single batch.                                                           | 4/3 |
|                                                                     | D | No exchange.                                                                    | 0   |

**xiii. Delivery Stalls**

|                                                                                                                                                               |   |                                                           |     |
|---------------------------------------------------------------------------------------------------------------------------------------------------------------|---|-----------------------------------------------------------|-----|
| 45) Choose the status of disinfection procedure for mutilation materials                                                                                      | A | Disinfect per piglet.                                     | 4   |
|                                                                                                                                                               | B | Disinfect per single littler.                             | 8/3 |
|                                                                                                                                                               | C | Disinfect per single batch.                               | 4/3 |
|                                                                                                                                                               | D | No disinfection.                                          | 0   |
| 46) Choose the status of cross fostering.<br>* Cross fostering : sows with less liveborn piglets than teats can receive the excessed piglets from other sows. | A | Execute at minimum level after adequate colostrum intake. | 4   |
|                                                                                                                                                               | B | Execute actively after adequate colostrum intake.         | 2   |

|                                                                                                                                          |                            |                                                                                                             |     |
|------------------------------------------------------------------------------------------------------------------------------------------|----------------------------|-------------------------------------------------------------------------------------------------------------|-----|
|                                                                                                                                          | <input type="checkbox"/> C | Execute before giving adequate colostrum intake.                                                            | 0   |
| 47) Choose the status of operating nurse sows.<br>* Nurse sows: sows wean her own piglets to give extra teat capacity to excess piglets. | <input type="checkbox"/> A | Execute at minimum level after adequate colostrum intake.                                                   | 4   |
|                                                                                                                                          | <input type="checkbox"/> B | Execute actively after adequate colostrum intake.                                                           | 2   |
|                                                                                                                                          | <input type="checkbox"/> C | Execute before giving adequate colostrum intake.                                                            | 0   |
| 48) Choose the status of caring runt piglets.                                                                                            | <input type="checkbox"/> A | Operate active culling.                                                                                     | 4   |
|                                                                                                                                          | <input type="checkbox"/> B | No culling but use fostering technic or early weaning.                                                      | 8/3 |
|                                                                                                                                          | <input type="checkbox"/> C | No fostering and wean as usual.                                                                             | 4/3 |
|                                                                                                                                          | <input type="checkbox"/> D | Pass to the nursing sow and mix with healthy piglets or isolate with excessed weaning age at farrowing pen. | 0   |
